# Supplementary material for: FBXO24 deletion causes abnormal accumulation of membraneless electron-dense granules in sperm flagella and male infertility
Source: eLife. 2024 Aug 20;13:RP92794. doi: 10.7554/eLife.92794 (PMC11335345; doi:10.7554/eLife.92794)
Supplement: Supplementary file 1. [file elife-92794-supp1.xlsx]

## Sheet: Primers and gRNAs
primer	sequence (5'-3')
Fbxo24 Fw #1	tcctctggcaggtgaagcgc
Fbxo24 Fw #2	gatgtgttgattgtatgagacttcc
Fbxo24 Fw #3	actagcagcaagaagtccagg
Fbxo24 Rv #1	tctcgctcatgatagtcagg
Fbxo24 Rv #2	gaagtatggcaaagtcactgagtgc
Fbxo24 Rv #3	aagaatggcagctctcttcc
Fbxo24 Tg Fw	tgaagtgtgtgatgctgagg
Fbxo24 Tg Rv	gttcccgagtagccaaaaca
Fbxo24 Cloning Fw	atggatccgccgccatggtgaagcgcagctgcccttc
Fbxo24 Cloning Rv	gcgaattcgctctcgggagtcgaggtgtctgg
Skp1 Cloning Fw	attctagagccgccatgcctacgataaagttgc
Skp1 Cloning Rv	gcctgcagcttctcttcacaccattgg
Ipo5 Cloning Fw	atgtcgacgccgccatggcggcggccgcggcggagcagc
Ipo5 Cloning Rv	gcgctagcggcagagttcaggagctcctggatgg
Actb Fw	catccgtaaagacctctatgccaac
Actb Rv	atggagccaccgatccaca
gRNA	target sequence (5'-3')
Fbxo24 gRNA #1	tgtggaggcgcatctgtcga
Fbxo24 gRNA #2	tcctgaaggaagtcgagccg
Fbxo24 gRNA #3	tcagttgttccccccagagc
