# Supplementary material for: FBXO24 deletion causes abnormal accumulation of membraneless electron-dense granules in sperm flagella and male infertility
Source: eLife. 2024 Aug 20;13:RP92794. doi: 10.7554/eLife.92794 (PMC11335345; doi:10.7554/eLife.92794)
Supplement: Supplementary file 2. [file elife-92794-supp2.xlsx]

## Sheet: Antibodies
Antibodies	Source	Identifier
Rabbit anti-KPNA2	Abcam	ab84440
Rabbit anti-β-actin	MBL	PM053
Rabbit anti-human septin4	IBL	18987
Rabbit anti-IPO5 (H-300)	SantaCruz	sc-11369
Rabbit anti-Miwi (G82)	Cell Sinaling Technology	2079
Rabbit anti-Syntaxin2	Synaptic Systems	110 123
Rabbit anti-LY6K	[1]
Rabbit anti-HA tag	MBL	561
Rabbit anti-ADAD1	[2]
Rabbit anti-TSKS	[3]
Rabbit anti-TSSK1	[3]
Rat anti-ADAD2	[2]
Rat anti-IZUMO1	[4]	125
Rat anti-SLC2A3	[5]	10
Rat anti-PA tag (NZ-1)	FUJIFILM Wako	012-25863
Mouse anti-1D4 tag	Gift from Dr. Martin M. Matzuk
Mouse anti-FLAG tag (M2)	Sigma-Aldrich	F1804
Mouse anti-α-tubulin (B-5-1-2)	Sigma-Aldrich	T5168
Mouse anti-acetylated tubulin	Sigma-Aldrich	T7451
Mouse anti-ADAM3 (F-4)	SantaCruz	sc-365288
Mouse anti-IPO5 (B-7)	SantaCruz	sc-55527
Mouse anti-β-actin (AC-15)	Abcam	ab6276
Mouse anti-KPNB1	Abcam	ab2811
Goat anti-rabbit IgG-HRP	Jackson ImmunoResearch	111-036-045
Goat anti-rat IgG-HRP	Jackson ImmunoResearch	112-035-167
Goat anti-mouse IgG-HRP	Jackson ImmunoResearch	115-036-062
Goat anti-rabbit IgG-Alexa Fluor 488	Thermo Fisher Scientific	A11070
Goat anti-rabbit IgG-Alexa Fluor 546	Thermo Fisher Scientific	A11071
Goat anti-rat IgG-Alexa Fluor 488	Thermo Fisher Scientific	A11006
Goat anti-rat IgG-Alexa Fluor 546	Thermo Fisher Scientific	A11081
Goat anti-mouse IgG-Alexa Fluor 546	Thermo Fisher Scientific	A11017
Goat anti-mouse IgG-Alexa Fluor 546	Thermo Fisher Scientific	A11018
[1] Yoshitake H, Tsukamoto H, Maruyama-Fukushima M, Takamori K, Ogawa H, Araki Y. 2008. TEX101, a germ cell-marker glycoprotein, is associated with lymphocyte antigen 6 complex locus k within the mouse testis. Biochem Biophys Res Commun 372:277–282. doi:10.1016/j.bbrc.2008.05.088.
[2] Lu Y, Nagamori I, Kobayashi H, Kojima‐Kita K, Shirane K, Chang H, Nishimura T, Koyano T, Yu Z, Castañeda JM, Matsuyama M, Kuramochi‐Miyagawa S, Matzuk MM, Ikawa M. 2023. ADAD2 functions in spermiogenesis and piRNA biogenesis in mice. Andrology 11:698–709. doi:10.1111/andr.13400.
[3] Shimada K, Park S, Oura S, Noda T, Morohoshi A, Matzuk MM, Ikawa M. 2023. TSKS localizes to nuage in spermatids and regulates cytoplasmic elimination during spermiation. Proceedings of the National Academy of Sciences 120:e2221762120. doi:10.1073/pnas.2221762120.
[4] Ikawa M, Tokuhiro K, Yamaguchi R, Benham AM, Tamura T, Wada I, Satouh Y, Inoue N, Okabe M. 2011. Calsperin is a testis-specific chaperone required for sperm fertility. Journal of Biological Chemistry 286:5639–5646. doi:10.1074/jbc.M110.140152.
[5] Fujihara Y, Tokuhiro K, Muro Y, Kondoh G, Araki Y, Ikawa M, Okabe M. 2013. Expression of TEX101, regulated by ACE, is essential for the production of fertile mouse spermatozoa. Proceedings of the National Academy of Sciences 110:8111-8116. doi: 10.1073/pnas.1222166110.
